# Supplementary material
Source: bioRxiv or medRxiv preprint supplement (https://www.biorxiv.org/highwire/filestream/26969/field_highwire_adjunct_files/10/095349-8.pdf)
Supplement: Supplementary file [file 095349-8.pdf]

| Top promoter[SNPs in top promoter]                             | Linkage                                                                                                                                                                                                                                                                | Corrected coexpression score | FDR  |
|----------------------------------------------------------------|------------------------------------------------------------------------------------------------------------------------------------------------------------------------------------------------------------------------------------------------------------------------|------------------------------|------|
| p58@APOB [rs533617]                                            |                                                                                                                                                                                                                                                                        | 0.74                         | 0.0  |
| p@chr7:44581054..44581057,+ [rs41279633, rs17655652]           |                                                                                                                                                                                                                                                                        | 0.68                         | 0.0  |
|                                                                | rs17655652:rs732797 D'=0.92; r <sup>2</sup> =0.4.<br>p@chr7:44646674..44646689,+ [rs732797]                                                                                                                                                                            | 0.26                         | 0.3  |
| p6@HNF1A-AS1 [rs1169286]                                       |                                                                                                                                                                                                                                                                        | 0.65                         | 0.0  |
|                                                                | rs1169286:rs2258287 D'=0.68; r <sup>2</sup> =0.39. p1@C12orf43 [rs2258287]                                                                                                                                                                                             | 0.16                         | 0.61 |
| p2@ENST00000518619 [rs11774381, rs9987289, rs4841132]          |                                                                                                                                                                                                                                                                        | 0.64                         | 0.0  |
|                                                                | rs9987289:rs7357361 D'=1.0; r <sup>2</sup> =0.57.<br>enhancer@chr8:9219931-9220273 [rs7357361];rs4841132:rs7357361 D'=1.0; r <sup>2</sup> =0.57.<br>enhancer@chr8:9219931-9220273 [rs7357361]                                                                          | 0.26                         | 0.3  |
| p3@LIPC [rs2070895]                                            |                                                                                                                                                                                                                                                                        | 0.61                         | 0.0  |
| p5@ABCA1 [rs1800978]                                           |                                                                                                                                                                                                                                                                        | 0.58                         | 0.0  |
| p3@ABCG5 [rs11887534]                                          |                                                                                                                                                                                                                                                                        | 0.54                         | 0.0  |
|                                                                | rs11887534:rs13395550 D'=0.25; r <sup>2</sup> =0.06.<br>enhancer@chr2:44007303-44007575 [rs13395550]                                                                                                                                                                   | 0.08                         | 0.81 |
| p1@GPN1 [rs3749147]                                            |                                                                                                                                                                                                                                                                        | 0.54                         | 0.0  |
|                                                                | same SNP, different promoter: p1@CCDC121 [rs3749147]                                                                                                                                                                                                                   | 0.06                         | 0.87 |
| enhancer@chr6:30731311-30731508 [rs3095338]                    |                                                                                                                                                                                                                                                                        | 0.52                         | 0.0  |
|                                                                | rs3095338:rs8233 D'=0.91; r <sup>2</sup> =0.62.<br>p@chr6:30692851..30692934,+ [rs8233]                                                                                                                                                                                | 0.17                         | 0.58 |
| p3@HAVCR1 [rs67960962]                                         |                                                                                                                                                                                                                                                                        | 0.51                         | 0.0  |
|                                                                | rs67960962:rs6882076 D'=0.83; r <sup>2</sup> =0.31. p1@TIMD4 [rs6882076]                                                                                                                                                                                               | 0.06                         | 0.87 |
| p1@APOA5 [rs651821]                                            |                                                                                                                                                                                                                                                                        | 0.51                         | 0.0  |
|                                                                | rs651821:rs689243 D'=1.0; r <sup>2</sup> =0.21.<br>enhancer@chr11:116722234-116722744 [rs689243]                                                                                                                                                                       | 0.0                          | 1.0  |
| p1@ENST00000447070 [rs6760828]                                 |                                                                                                                                                                                                                                                                        | 0.5                          | 0.0  |
|                                                                | rs6760828:rs4665963 D'=0.77; r <sup>2</sup> =0.31.<br>p@chr2:27528919..27528940,+ [rs4665963]                                                                                                                                                                          | 0.33                         | 0.12 |
| p@chr16:72075048..72075055,- [rs9932951]                       |                                                                                                                                                                                                                                                                        | 0.48                         | 0.0  |
|                                                                | rs9932951:rs3213422 D'=0.29; r <sup>2</sup> =0.08. p1@DHODH [rs34270657, rs3213422]                                                                                                                                                                                    | 0.43                         | 0.01 |
| p1@SPTY2D1 [rs7943121]                                         |                                                                                                                                                                                                                                                                        | 0.48                         | 0.0  |
| p@chr19:19616795..19616800,+ [rs1063966]                       |                                                                                                                                                                                                                                                                        | 0.48                         | 0.0  |
|                                                                | rs1063966:rs73004933 D'=1.0; r <sup>2</sup> =0.19.<br>p@chr19:19675738..19675742,- [rs73004933]<br>rs1063966:rs4808967 D'=1.0; r <sup>2</sup> =1.0.<br>p@chr19:19640454..19640461,+ [rs4808967]                                                                        | 0.37                         | 0.06 |
|                                                                |                                                                                                                                                                                                                                                                        | 0.11                         | 0.76 |
| p@chr6:26500524..26500540,+ [rs13194984]                       |                                                                                                                                                                                                                                                                        | 0.47                         | 0.0  |
| p3@SLC22A1 [rs12208357]                                        |                                                                                                                                                                                                                                                                        | 0.46                         | 0.0  |
| p6@RBM39 [rs2425090]                                           |                                                                                                                                                                                                                                                                        | 0.46                         | 0.0  |
| p16@HLA-DQA1 [rs9272775]                                       |                                                                                                                                                                                                                                                                        | 0.44                         | 0.01 |
| p37@CFB [rs2072633]                                            |                                                                                                                                                                                                                                                                        | 0.44                         | 0.01 |
| p@chr2:27975692..27975750,+ [rs6547796]                        |                                                                                                                                                                                                                                                                        | 0.43                         | 0.01 |
|                                                                | rs6547796:rs13013484 D'=1.0; r <sup>2</sup> =0.9.<br>p@chr2:27988549..27988557,- [rs13013484]                                                                                                                                                                          | 0.17                         | 0.58 |
| chr6:160770176..160770186,- [rs474513, rs539298]               |                                                                                                                                                                                                                                                                        | 0.43                         | 0.01 |
| p7@PCSK9 [rs11591147]                                          |                                                                                                                                                                                                                                                                        | 0.42                         | 0.02 |
| p@chr19:45411878..45411884,- [rs7412]                          |                                                                                                                                                                                                                                                                        | 0.41                         | 0.02 |
| p1@FEN1 [rs412334, rs174538]                                   |                                                                                                                                                                                                                                                                        | 0.4                          | 0.03 |
|                                                                | same SNP, different promoter: p4@C11orf10 [rs412334];rs174538:rs412334 D'=1.0; r <sup>2</sup> =0.07.<br>p4@C11orf10 [rs412334]                                                                                                                                         | 0.35                         | 0.07 |
| p1@SPATC1 [rs6985603]                                          |                                                                                                                                                                                                                                                                        | 0.39                         | 0.04 |
| p@chr18:47176875..47176889,+ [rs4939886, rs4939887, rs4939888] |                                                                                                                                                                                                                                                                        | 0.39                         | 0.04 |
| p1@NAT2 [rs4646246]                                            |                                                                                                                                                                                                                                                                        | 0.38                         | 0.05 |
| p@chr9:136154265..136154271,- [rs579459, rs649129]             |                                                                                                                                                                                                                                                                        | 0.38                         | 0.05 |
|                                                                | rs579459:rs568203 D'=1.0; r <sup>2</sup> =0.1.<br>p@chr9:136151396..136151407,- [rs568203];rs649129:rs568203 D'=1.0; r <sup>2</sup> =0.1.<br>p@chr9:136151396..136151407,- [rs568203]                                                                                  | 0.26                         | 0.3  |
| enhancer@chr8:126446642-126447323 [rs2385114]                  |                                                                                                                                                                                                                                                                        | 0.37                         | 0.06 |
| p@chr1:63112277..63112278,+ [rs1168085]                        |                                                                                                                                                                                                                                                                        | 0.37                         | 0.06 |
| p3@NSMAF [rs2279460]                                           |                                                                                                                                                                                                                                                                        | 0.37                         | 0.06 |
| enhancer@chr20:34127589-34128004 [rs2104417]                   |                                                                                                                                                                                                                                                                        | 0.36                         | 0.07 |
| p13@UGT1A6 [rs2070959]                                         |                                                                                                                                                                                                                                                                        | 0.36                         | 0.07 |
|                                                                | rs2070959:rs17864701 D'=0.92; r <sup>2</sup> =0.8. p2@DNAJB3 [rs17864701]                                                                                                                                                                                              | 0.25                         | 0.3  |
| p2@SPC24 [rs892114, rs7251031]                                 |                                                                                                                                                                                                                                                                        | 0.36                         | 0.07 |
| enhancer@chr5:74805918-74806308 [rs5744533]                    |                                                                                                                                                                                                                                                                        | 0.36                         | 0.07 |
| p1@AK311221 [rs9469089]                                        |                                                                                                                                                                                                                                                                        | 0.35                         | 0.09 |
|                                                                | rs9469089:rs3134931 D'=0.49; r <sup>2</sup> =0.14.<br>p@chr6:32190527..32190536,- [rs3134931]                                                                                                                                                                          | 0.09                         | 0.81 |
| p@chr16:68114139..68114174,+ [rs7188085]                       |                                                                                                                                                                                                                                                                        | 0.34                         | 0.1  |
| p@chr1:221054751..221054771,- [rs17597773]                     |                                                                                                                                                                                                                                                                        | 0.34                         | 0.1  |
| p1@POC5 [rs2291630]                                            |                                                                                                                                                                                                                                                                        | 0.33                         | 0.11 |
|                                                                | rs2291630:rs34358 D'=1.0; r <sup>2</sup> =0.47.<br>p@chr5:74965139..74965165,+ [rs34358]<br>rs2291630:rs2047059 D'=1.0; r <sup>2</sup> =0.64. p2@POC5 [rs2047059]<br>rs2291630:rs7715806 D'=0.95; r <sup>2</sup> =0.39.<br>enhancer@chr5:75034241-75034569 [rs7715806] | 0.24                         | 0.37 |
|                                                                |                                                                                                                                                                                                                                                                        | 0.17                         | 0.58 |
|                                                                |                                                                                                                                                                                                                                                                        | 0.16                         | 0.63 |
| p2@LY6G6C [rs805292]                                           |                                                                                                                                                                                                                                                                        | 0.33                         | 0.11 |
| p@chr6:16131425..16131449,+ [rs2235215]                        |                                                                                                                                                                                                                                                                        | 0.33                         | 0.11 |
| p@chr2:136594310..136594317,+ [rs2236783]                      |                                                                                                                                                                                                                                                                        | 0.33                         | 0.12 |
|                                                                | rs2236783:rs1438307 D'=0.94; r <sup>2</sup> =0.85. p2@UBXN4 [rs1438307]                                                                                                                                                                                                | 0.13                         | 0.74 |
| enhancer@chr6:135435494-135435847 [rs9483788]                  |                                                                                                                                                                                                                                                                        | 0.32                         | 0.13 |
| p1@HLA-DRB9 [rs13191565]                                       |                                                                                                                                                                                                                                                                        | 0.31                         | 0.17 |
| p1@USP1 [rs646179]                                             |                                                                                                                                                                                                                                                                        | 0.3                          | 0.2  |
| enhancer@chr19:45242034-45242469 [rs1531517]                   |                                                                                                                                                                                                                                                                        | 0.28                         | 0.23 |
|                                                                | rs1531517:rs10422182 D'=0.62; r <sup>2</sup> =0.22.<br>p@chr19:45159154..45159158,+ [rs10422182]                                                                                                                                                                       | 0.09                         | 0.81 |
| p@chr19:10961151..10961183,+ [rs11085749]                      |                                                                                                                                                                                                                                                                        | 0.28                         | 0.25 |

|                                                                    |                                                                                                                                                                                                                                                                                                      |             |              |
|--------------------------------------------------------------------|------------------------------------------------------------------------------------------------------------------------------------------------------------------------------------------------------------------------------------------------------------------------------------------------------|-------------|--------------|
|                                                                    | rs11085749:rs2288842 D'=1.0; r <sup>2</sup> =0.61.<br>chr19:11031515..11031547,+ [rs2288842]                                                                                                                                                                                                         | 0.23        | 0.38         |
| p12@PLCG1 [rs6124323]                                              |                                                                                                                                                                                                                                                                                                      | 0.28        | 0.25         |
| enhancer@chr10:17254796-17255338 [rs7080366]                       |                                                                                                                                                                                                                                                                                                      | 0.27        | 0.26         |
| p2@LPIN3 [rs6029636]                                               |                                                                                                                                                                                                                                                                                                      | 0.26        | 0.29         |
| p1@ENST00000408001 [rs2764205]                                     |                                                                                                                                                                                                                                                                                                      | 0.25        | 0.3          |
|                                                                    | rs2764205:rs3800457 D'=1.0; r <sup>2</sup> =0.96.<br>enhancer@chr6:34663389-34663600 [rs3800457]                                                                                                                                                                                                     | 0.08        | 0.81         |
| enhancer@chr16:56985400-56985562 [rs12448528,<br>rs72786786]       |                                                                                                                                                                                                                                                                                                      | 0.25        | 0.3          |
| p@chr9:15298766..15298791,+ [rs675849]                             |                                                                                                                                                                                                                                                                                                      | 0.24        | 0.36         |
| p@chr1:63266602..63266609,- [rs11208033, rs10493328,<br>rs4409690] |                                                                                                                                                                                                                                                                                                      | 0.23        | 0.38         |
|                                                                    | rs11208033:rs12122434 D'=1.0; r <sup>2</sup> =0.22.<br>p@chr1:63261897..63261900,+<br>[rs12122434];rs10493328:rs12122434 D'=1.0; r <sup>2</sup> =0.22.<br>p@chr1:63261897..63261900,+<br>[rs12122434];rs4409690:rs12122434 D'=1.0; r <sup>2</sup> =0.22.<br>p@chr1:63261897..63261900,+ [rs12122434] | 0.08        | 0.81         |
| p4@SH2B3 [rs739496]                                                |                                                                                                                                                                                                                                                                                                      | 0.23        | 0.38         |
| p3@C6orf10 [rs6913309, rs2050189]                                  |                                                                                                                                                                                                                                                                                                      | 0.21        | 0.45         |
| p@chr2:113841162..113841225,+ [rs6734238]                          |                                                                                                                                                                                                                                                                                                      | 0.21        | 0.45         |
| p1@FRK [rs1999929]                                                 |                                                                                                                                                                                                                                                                                                      | 0.21        | 0.45         |
| p@chr16:71934252..71934256,+ [rs4788576]                           |                                                                                                                                                                                                                                                                                                      | 0.2         | 0.48         |
| enhancer@chr2:136816831-136817220 [rs749873]                       |                                                                                                                                                                                                                                                                                                      | 0.19        | 0.55         |
|                                                                    | rs749873:rs309137 D'=0.86; r <sup>2</sup> =0.52.<br>enhancer@chr2:136765824-136766130 [rs309137]<br>rs749873:rs6714750 D'=1.0; r <sup>2</sup> =0.55.<br>enhancer@chr2:136783030-136783335 [rs6714750]                                                                                                | 0.12<br>0.1 | 0.76<br>0.79 |
| p4@HMGR [rs3761740]                                                |                                                                                                                                                                                                                                                                                                      | 0.19        | 0.56         |
| enhancer@chr19:46018095-46018753 [rs7255743]                       |                                                                                                                                                                                                                                                                                                      | 0.18        | 0.56         |
| p6@UBASH3B [rs7127978]                                             |                                                                                                                                                                                                                                                                                                      | 0.18        | 0.58         |
| enhancer@chr11:48004294-48004631 [rs7946766]                       |                                                                                                                                                                                                                                                                                                      | 0.17        | 0.58         |
| chr20:39634184..39634189,- [rs1000410]                             |                                                                                                                                                                                                                                                                                                      | 0.17        | 0.58         |
| p@chr2:203131655..203131667,- [rs7581542]                          |                                                                                                                                                                                                                                                                                                      | 0.17        | 0.58         |
| chr11:118486256..118486298,+ [rs11603023]                          |                                                                                                                                                                                                                                                                                                      | 0.17        | 0.58         |
| p@chr11:116980715..116980720,- [rs10892074]                        |                                                                                                                                                                                                                                                                                                      | 0.15        | 0.66         |
|                                                                    | rs10892074:rs508487 D'=1.0; r <sup>2</sup> =0.09.<br>p@chr11:117075245..117075293,- [rs508487]                                                                                                                                                                                                       | 0.02        | 0.96         |
| enhancer@chr16:31129616-31130225 [rs9925964]                       |                                                                                                                                                                                                                                                                                                      | 0.15        | 0.66         |
| p@chr12:112212004..112212016,+ [rs2238151]                         |                                                                                                                                                                                                                                                                                                      | 0.14        | 0.67         |
| p4@GSTM4 [rs1010167]                                               |                                                                                                                                                                                                                                                                                                      | 0.14        | 0.67         |
| p@chr17:76377571..76377602,- [rs4082919]                           |                                                                                                                                                                                                                                                                                                      | 0.13        | 0.74         |
| p@chr1:109784420..109784424,+ [rs688386]                           |                                                                                                                                                                                                                                                                                                      | 0.12        | 0.75         |
| p@chr4:88057279..88057283,+ [rs1408]                               |                                                                                                                                                                                                                                                                                                      | 0.12        | 0.76         |
| p6@SYN2 [rs3773364]                                                |                                                                                                                                                                                                                                                                                                      | 0.11        | 0.78         |
| chr19:10742301..10742328,+ [rs2288904, rs1560711]                  |                                                                                                                                                                                                                                                                                                      | 0.11        | 0.78         |
| chr6:31808499..31808514,+ [rs599707]                               |                                                                                                                                                                                                                                                                                                      | 0.1         | 0.78         |
| p1@ERGIC2 [rs2278093]                                              |                                                                                                                                                                                                                                                                                                      | 0.1         | 0.8          |
| p2@HLA-L [rs9391806]                                               |                                                                                                                                                                                                                                                                                                      | 0.09        | 0.81         |
| p6@PHC1 [rs3809218]                                                |                                                                                                                                                                                                                                                                                                      | 0.09        | 0.81         |
| p@chr5:74964235..74964256,+ [rs7715739, rs369034591]               |                                                                                                                                                                                                                                                                                                      | 0.09        | 0.81         |
| p@chr17:37405559..37405561,- [rs2061342]                           |                                                                                                                                                                                                                                                                                                      | 0.08        | 0.81         |
| p@chr2:28124429..28124474,+ [rs10177845]                           |                                                                                                                                                                                                                                                                                                      | 0.08        | 0.81         |
| enhancer@chr22:35708559-35708961 [rs138774]                        |                                                                                                                                                                                                                                                                                                      | 0.08        | 0.82         |
| p@chr2:216286896..216286912,- [rs1250248]                          |                                                                                                                                                                                                                                                                                                      | 0.07        | 0.87         |
| p@chr2:135893438..135893485,+ [rs10445686]                         |                                                                                                                                                                                                                                                                                                      | 0.06        | 0.87         |
| enhancer@chr17:37836315-37836462 [rs9303274]                       |                                                                                                                                                                                                                                                                                                      | 0.06        | 0.87         |
|                                                                    | rs9303274:rs1053651 D'=0.91; r <sup>2</sup> =0.65.<br>p@chr17:37822585..37822591,+ [rs1053651]                                                                                                                                                                                                       | 0.01        | 0.99         |
| enhancer@chr15:58712788-58712944 [rs11854624]                      |                                                                                                                                                                                                                                                                                                      | 0.06        | 0.87         |
|                                                                    | rs11854624:rs17821310 D'=1.0; r <sup>2</sup> =0.86. p1@LIPC<br>[rs17821310]                                                                                                                                                                                                                          | 0.01        | 0.99         |
| enhancer@chr8:59311673-59312115 [rs1030431]                        |                                                                                                                                                                                                                                                                                                      | 0.05        | 0.9          |
| p@chr20:34001017..34001019,- [rs6087704]                           |                                                                                                                                                                                                                                                                                                      | 0.05        | 0.9          |
| enhancer@chr11:61713558-61713889 [rs1534842]                       |                                                                                                                                                                                                                                                                                                      | 0.04        | 0.91         |
| p1@GPR61 [rs552101]                                                |                                                                                                                                                                                                                                                                                                      | 0.04        | 0.91         |
| p@chr3:12704956..12704973,- [rs904453]                             |                                                                                                                                                                                                                                                                                                      | 0.04        | 0.92         |
| p2@CU690121 [rs12225230]                                           |                                                                                                                                                                                                                                                                                                      | 0.04        | 0.92         |
| enhancer@chr1:92668364-92668570 [rs3131816]                        |                                                                                                                                                                                                                                                                                                      | 0.03        | 0.96         |
| p2@PACSIN1 [rs11758326]                                            |                                                                                                                                                                                                                                                                                                      | 0.01        | 0.98         |
| p1@ATXN2 [rs695871]                                                |                                                                                                                                                                                                                                                                                                      | 0.0         | 1.0          |

| Cell type                                                   | RRA p   | FDR    |
|-------------------------------------------------------------|---------|--------|
| Hepatocyte                                                  | 1.6e-17 | 0      |
| liver adult pool1                                           | 6.8e-12 | 0      |
| Prostate Epithelial Cells                                   | 7.6e-07 | 0      |
| liver fetal pool1                                           | 4.8e-06 | 0      |
| intestinal epithelial cells polarised                       | 0.00013 | 0      |
| colon adult pool1                                           | 0.0042  | 0.0029 |
| HES3GFP Embryonic Stem cells cardiomyocytic induction day12 | 4.1e-06 | 0.0037 |
| HES3GFP Embryonic Stem cells cardiomyocytic induction day05 | 0.00097 | 0.0038 |
| Renal Proximal Tubular Epithelial Cell                      | 0.041   | 0.0038 |
| Renal Mesangial Cells                                       | 0.024   | 0.0043 |
| H9 Embryoid body cells melanocytic induction day12          | 0.0016  | 0.0047 |
| kidney fetal pool1                                          | 0.019   | 0.0072 |
| HES3GFP Embryonic Stem cells cardiomyocytic induction day02 | 0.0019  | 0.011  |
| HES3GFP Embryonic Stem cells cardiomyocytic induction day08 | 0.0057  | 0.038  |
| HES3GFP Embryonic Stem cells cardiomyocytic induction day07 | 0.0023  | 0.04   |
